# Supplementary material
Source: publisher figshare collection journal article supplement (https://acs.figshare.com/ndownloader/files/34012875)
Supplement: Supplementary file 1 [file 34012875]

# Enhanced Characterization of Cardiolipins via Hybrid 193 nm Ultraviolet Photodissociation Mass Spectrometry

Luis A. Macias and Jennifer S. Brodbelt\*

Department of Chemistry, The University of Texas at Austin, Austin, TX, 78712

## Supporting Information

|                                                                                                                                                                                                                                                                                                                                                                                                        |     |
|--------------------------------------------------------------------------------------------------------------------------------------------------------------------------------------------------------------------------------------------------------------------------------------------------------------------------------------------------------------------------------------------------------|-----|
| Supplementary Methods                                                                                                                                                                                                                                                                                                                                                                                  | S2  |
| Table S1. Structure of all standard lipids                                                                                                                                                                                                                                                                                                                                                             | S3  |
| Table S2. Product ion m/z values for HCD/UVPD fatty acid allyl ester fragments of common fatty acids.                                                                                                                                                                                                                                                                                                  | S4  |
| Table S3. E. coli CL structures characterized with sn-isomer and double bond resolution.                                                                                                                                                                                                                                                                                                               | S5  |
| Table S4. PTC CL structures characterized with sn-isomer resolution. Isomer percentages are not reported for PA moieties composed of identical acyl chains (i.e. 18:2/18:2) or moieties for which the sn-isomer was not identified.                                                                                                                                                                    | S6  |
| Scheme S1. Fragmentation pathway for dioxolane fragments.                                                                                                                                                                                                                                                                                                                                              | S7  |
| Figure S1. (A) HCD (25 NCE) spectrum of sodium-cationized overmethylated CL (16:0/18:1)/(16:0/18:1) and (B) fragment map. Fragment ions of m/z 599.50 and m/z 711.49 are shown with 50x magnification.                                                                                                                                                                                                 | S8  |
| Figure S2. Fragment map for 18:1(9Z)/16:0 dioxolane sn-isomer marked with fragments observed in HCD/UVPD spectrum in Fig 2C.                                                                                                                                                                                                                                                                           | S9  |
| Figure S3. Positive mode nESI spectrum of PG 16:0/18:1(9Z) (A) prior to derivatization and (B) post TMSD methylation. Positive mode nESI spectrum of PG 18:1(9Z)/16:0 (C) prior to derivatization and (D) post TMSD methylation                                                                                                                                                                        | S10 |
| Figure S4. (A) CID (32 NCE) spectrum of sodium-cationized methylated PG 16:0/18:1(9Z) and (B) fragment map. (C) CID (32 NCE) spectrum of sodium-cationized methylated PG 18:1(9Z)/16:0 and (D) fragment map.                                                                                                                                                                                           | S11 |
| Figure S5. Positive mode MS1 spectrum of methylated E. coli CL extract ionized from solution doped with sodium acetate.                                                                                                                                                                                                                                                                                | S12 |
| Figure S6. HCD/UVPD analysis of m/z 1425 from methylated E. coli extract.                                                                                                                                                                                                                                                                                                                              | S13 |
| Figure S7. HCD/UVPD analysis of PA moieties from CL 51:2 at m/z 1413.98 produced from the methylated E. coli CL extract. (A) HCD/UVPD of moiety PA 32:1 (dioxolane m/z of 571.47) results in fragment ions in agreement with (B) 16:0/16:1 dioxolane structure. (C) HCD/UVPD of moiety PA 33:1 (dioxolane m/z of 585.48) results in fragment ions in agreement with (D) 16:0/17:1 dioxolane structure. | S14 |
| Figure S8. (A) HCD (25 NCE) spectrum of m/z 1413.98 from methylated E. coli CL extract. Fragment maps for (B) methylated CL (16:0/16:1) (16:0/17:1) and (C) overmethylated CL (16:0/16:1) (16:0/16:1) are shown.                                                                                                                                                                                       | S15 |
| Figure S9. Positive mode MS1 spectrum of methylated PTC total lipid extract ionized from solution doped with sodium acetate. (A) Scan from m/z 400-2000, with 20x magnification of CLs present in 1400-1600 m/z range. (B) Scan of m/z 1000 – 2000, showing predominance of CL species in this mass range.                                                                                             | S16 |
| Figure S10. (A) HCD (25 NCE) spectrum and fragment map of m/z 1500.00 from methylated PTC total lipid extract. (B) MS3 UVPD (10 pulses at 3 mJ) of m/z 621.49 and corresponding fragment maps for 18:2(9Δ,12 Δ)/18:2(9Δ,12 Δ), 16:0/20:4, and 20:4/16:0 dioxolane structures.                                                                                                                          | S17 |
| Figure S11. (A) HCD (25 NCE) spectrum and fragment map of m/z 1502.01 from methylated PTC total lipid extract.. (B) MS3 UVPD (10 pulses at 3 mJ) of m/z 621.48 and corresponding fragment maps for 18:2/18:2, 16:0/20:4, and 20:4/16:0 dioxolane structures (C) MS3 UVPD (10 pulses at 3 mJ) of m/z 623.48 and corresponding fragment maps for 18:1/18:2 and 18:2/18:1 dioxolane structures.           | S18 |
| Figure S12. HCD (25 NCE) spectrum and fragment map of m/z 1504.02 from methylated PTC total lipid extract (B) MS3 UVPD (10 pulses at 3 mJ) of m/z 623.50 and corresponding fragment maps for 18:2/18:2 and 18:2/18:1 dioxolane structures.                                                                                                                                                             | S19 |
| Figure S13. (A) HCD (25 NCE) spectrum and fragment map of m/z 1530.04 from methylated PTC total lipid extract. (B) MS3 UVPD (10 pulses at 3 mJ) of m/z 623.50 and corresponding fragment maps for 18:2/18:1 and 18:1/18:2 dioxolane structures (C) MS3 UVPD (10 pulses at 3 mJ) of m/z 649.52 and corresponding fragment maps for 18:0/20:4, 18:2/20:2, and 20:2/18:2 dioxolane structures.            | S20 |
| Figure S14. (A) HCD (30 NCE) spectrum and fragment map of m/z 806.57 from underivatized PTC total lipid extract, corresponding to sodium adducted PC 36:3. (B) MS3 UVPD (10 pulses at 3 mJ) of m/z 623.50 and corresponding fragment maps for 18:2/18:1 and 18:1/18:2 dioxolane structures.                                                                                                            | S21 |
| Supplementary references                                                                                                                                                                                                                                                                                                                                                                               | S22 |

## Supplementary Methods

**Materials.** CL standards, PG standards, and *E.coli* CL were purchased from Avanti Polar Lipids (Alabaster, Alabama). Molecular weights and structures for PG and CL standards are shown in **Table S1**. Sodium acetate, (trimethylsilyl)diazomethane (TMSD), HPLC grade water, and HPLC grade methanol were obtained from EMD Millipore (Billerica, MA). Chloroform was obtained from Sigma-Aldrich (St. Louis, MO). Methyl tert-butyl ether (MTBE) was obtained from Alfa Aesar (Haverhill, MA). A total lipid extract was prepared from a papillary thyroid carcinoma obtained from the Cooperative Human Tissue Network using a Bligh and Deyar lipid extraction protocol.<sup>1</sup> Prior to electrospray ionization, samples were prepared in a 50:50 methanol/chloroform solution doped with 1 mM sodium acetate at a final concentration of 2-10  $\mu$ M for CL and PG standards and 10 ng/ $\mu$ L for biological extracts, unless otherwise indicated.

**TMSD Methylation of Phospholipids.** Phospholipid derivatization via TMSD is described elsewhere<sup>2,2-5</sup> and adapted as follows: for lipid standards and the *E.coli* CL, 1 mg of material was dried out of the stock solution under a stream of nitrogen and resuspended in 500  $\mu$ L of upper phase of MTBE/methanol/water (100:30:25, v/v) mixture. For the papillary thyroid carcinoma, half of the material produced by the Bligh and Deyar extraction (approximately 1.5 mg) was solvated in 500  $\mu$ L of the MTBE/methanol/water mixture. To initiate the methylation reaction, 50  $\mu$ L of 2 M TMSD hexane solution were added to the lipid solution and incubated at room temperature for 20 minutes. The reaction was quenched with 10  $\mu$ L of glacial acetic acid, producing a visible color change from yellow to clear. The solution was subsequently washed 2x with 500  $\mu$ L of the lower phase of the MTBE/methanol/water mixture and centrifugation at 1500 g for 3 min. After the final wash, the organic phase was collected in a glass vial, dried down, and reconstituted at 1 mg/mL in chloroform for storage at -20 °C.

**Nomenclature.** Lipid shorthand notation was used as described by Liebsich et al.<sup>6</sup> and modified as previously described for CL.<sup>7</sup> Briefly, phospholipid classes are defined by letter abbreviations followed by sum composition or acyl chain composition as indicated by the number of carbons followed by “:” and the degrees of unsaturation. If *sn* regiochemistry is known, fatty acid identities are separated by “/” or otherwise by “\_”. If a double bond position is known, it is indicated in parentheses followed by Z, E, or  $\Delta$ , to indicate the geometry as *cis*, *trans*, or unknown, respectively. For CL, PA moiety compositions are indicated in parentheses to inform that the individual identities are known. PA compositions are separated by “/” or “\_” to indicate that the chirality of the central glycerol is known or unknown, respectively. For example, CL (16:0/18:0)\_(16:0/18:1(9Z)) indicates a CL structure composed of one PA moiety with a 16:0 fatty acid at *sn*-1 position and a 18:0 fatty acid at the *sn*-2 position, coupled to a second PA moiety with a 16:0 at the *sn*-1 position and 18:1 at the *sn*-2 position, where the latter fatty acid incorporates a *cis* double bond between carbon 9 and 10 on the acyl chain.

**Table S1.** Structure of all standard lipids.

| Lipid Name                                                                                                         | Lipid Structure                                                                     | Exact Mass (Da) |
|--------------------------------------------------------------------------------------------------------------------|-------------------------------------------------------------------------------------|-----------------|
| <p>1',3'-bis[1-palmitoyl-2-oleoyl-sn-glycero-3-phospho]-glycerol</p> <p>CL<br/>(16:0/18:1(9Z))/(16:0/18:1(9Z))</p> | 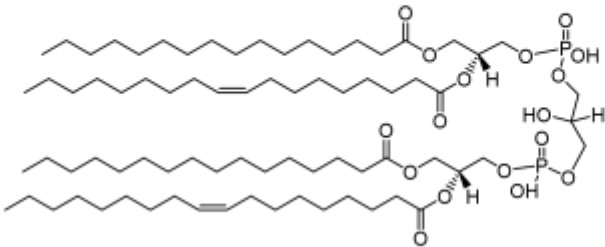  | 1405.00         |
| <p>1-palmitoyl-2-oleoyl-sn-glycero-3-phospho-(1'-rac-glycerol)</p> <p>PG 16:0/18:1(9Z)</p>                         |   | 748.53          |
| <p>1-oleoyl-2-palmitoyl-sn-glycero-3-phospho-(1'-rac-glycerol)</p> <p>PG 18:1(9Z)/16:0</p>                         |  | 748.53          |

**Table S2.** Product ion  $m/z$  values for HCD/UVPD fatty acid allyl ester fragments of common fatty acids.

| Fatty Acid | Allyl ester $m/z$ |
|------------|-------------------|
| 14:0       | 291.2295          |
| 14:1       | 289.2138          |
| 15:0       | 305.2451          |
| 15:1       | 303.2295          |
| 16:0       | 319.2608          |
| 16:1       | 317.2451          |
| 16:2       | 315.2295          |
| 17:0       | 333.2764          |
| 17:1       | 331.2608          |
| 18:0       | 347.2921          |
| 18:1       | 345.2764          |
| 18:2       | 343.2608          |
| 18:3       | 341.2451          |
| 19:0       | 361.3077          |
| 19:1       | 359.2921          |
| 20:0       | 375.3234          |
| 20:1       | 373.3077          |
| 20:2       | 371.2921          |
| 20:3       | 369.2764          |
| 20:4       | 367.2608          |
| 20:5       | 365.2451          |
| 22:6       | 391.2608          |

**Table S3.** *E. coli* CL structures characterized with *sn*-isomer and double bond resolution.

| Precursor (m/z) | HCD                       |                           |                      | UVPD                         |                        |              |                             | Major CL Isomer                               |
|-----------------|---------------------------|---------------------------|----------------------|------------------------------|------------------------|--------------|-----------------------------|-----------------------------------------------|
|                 | PA + Headgroup + Na (m/z) | PA Moiety Sum Composition | Dioxolane + Na (m/z) | Fatty Acid Alkyl Ester (m/z) | sn-stereochemistry     | PA isomer %  | Double Bond Fragments (m/z) |                                               |
| 1347.93         | 825.46                    | 30:0                      | 545.46               | 319.26<br>291.23             | 16:0/14:0<br>14:0/16:0 | 91.5<br>8.5  |                             | CL (16:0/14:0)_(16:0/14:0)                    |
| 1371.93         | 823.45                    | 30:1                      | 543.44               | 291.23<br>317.24             | 14:0/16:1<br>16:1/14:0 | 89.6<br>10.4 | 433.33, 457.33              | CL (16:0/16:1(9A))_(14:0/16:1(9A))            |
|                 | 851.48                    | 32:1                      | 571.47               | 319.26<br>317.24             | 16:0/16:1<br>16:1/16:0 | 94.5<br>5.5  | 461.36, 485.36              |                                               |
|                 |                           |                           |                      |                              |                        |              |                             |                                               |
| 1373.95         | 825.46                    | 30:0                      | 545.48               | 319.26<br>291.23             | 16:0/14:0<br>14:0/16:0 | 89.8<br>10.2 |                             | CL (16:0/16:1(9A))_(16:0/14:0)                |
|                 | 851.48                    | 32:1                      | 571.47               | 319.26<br>317.24             | 16:0/16:1<br>16:1/16:0 | 94.6<br>5.4  | 461.36, 485.36              |                                               |
|                 |                           |                           |                      |                              |                        |              |                             |                                               |
| 1397.95         | 849.46                    | 32:2                      | 569.45               | 317.24                       | 16:1/16:1              | -            | 459.34, 483.34              | CL (16:0/16:1(9A))_(16:1(9A)/16:1(9A))        |
|                 | 851.48                    | 32:1                      | 571.47               | 319.26<br>317.24             | 16:0/16:1<br>16:1/16:0 | 95.7<br>4.3  | 461.36, 485.36              |                                               |
|                 |                           |                           |                      |                              |                        |              |                             |                                               |
| 1399.96         | 851.47                    | 32:1                      | 571.47               | 319.26<br>317.24             | 16:0/16:1<br>16:1/16:0 | 95.5<br>4.5  | 461.36, 485.36              | CL (16:0/16:1(9A))_(16:0/16:1(9A))            |
| 1400.97         | 851.48                    | 32:1                      | 571.47               | 319.26<br>317.25             | 16:0/16:1<br>16:1/16:0 | 95.3<br>4.7  | 461.36, 485.36              | CL (16:0/16:0)_(16:0/16:1(9A))                |
|                 | 853.49                    | 32:0                      | 573.49               | 319.26                       | 16:0/16:0              | -            |                             |                                               |
|                 |                           |                           |                      |                              |                        |              |                             |                                               |
| 1403.99         | 853.49                    | 32:0                      | 573.49               | 319.26                       | 16:0/16:0              | -            |                             | CL (16:0/16:0)_(16:0/16:0)                    |
| 1423.96         | 849.46                    | 32:2                      | 569.45               | 317.24                       | 16:1/16:1              | -            | 459.34, 483.34              | CL (18:1(11A)/16:1(9A))_(16:1(9A)/16:1(9A))   |
|                 | 877.50                    | 34:2                      | 597.48               | 345.27<br>317.24             | 18:1/16:1<br>16:1/18:1 | 87.7<br>12.3 | 487.37, 511.37              |                                               |
|                 |                           |                           |                      |                              |                        |              |                             |                                               |
| 1425.98         | 851.48                    | 32:1                      | 571.47               | 319.26<br>317.24             | 16:0/16:1<br>16:1/16:0 | 93.4<br>6.6  | 461.36, 485.36              | CL (18:1(11A)/16:1(9A))_(16:0/16:1(9A))       |
|                 | 877.50                    | 34:2                      | 597.48               | 345.27<br>317.24             | 18:1/16:1<br>16:1/18:1 | 88.3<br>11.7 | 487.37, 511.37              |                                               |
|                 |                           |                           |                      |                              |                        |              |                             |                                               |
| 1427.99         | 851.48                    | 32:1                      | 571.47               | 319.26<br>317.24             | 16:0/16:1<br>16:1/16:0 | 95.3<br>4.7  | 461.36, 485.36              | CL (16:0/18:1(11A))_(16:0/16:1(9A))           |
|                 | 879.51                    | 34:1                      | 599.50               | 319.26<br>345.28             | 16:0/18:1<br>18:1/16:0 | 88.3<br>11.7 | 489.39, 513.39              |                                               |
|                 |                           |                           |                      |                              |                        |              |                             |                                               |
| 1451.99         | 877.50                    | 34:2                      | 597.49               | 345.27<br>317.24             | 18:1/16:1<br>16:1/18:1 | 87.5<br>12.5 | 487.37, 511.37              | CL (18:1(11A)/16:1(9A))_(18:1(11A)/16:1(9A))  |
| 1454.01         | 877.50                    | 34:2                      | 597.49               | 345.27<br>317.24             | 18:1/16:1<br>16:1/18:1 | 88.6<br>11.4 | 487.37, 511.37              | CL (18:1(11A)/16:1(9A))_(16:0/18:1(11A))      |
|                 | 879.51                    | 34:1                      | 599.50               | 319.26<br>345.28             | 16:0/18:1<br>18:1/16:0 | 92.3<br>7.7  | 489.39, 513.39              |                                               |
|                 |                           |                           |                      |                              |                        |              |                             |                                               |
| 1456.02         | 879.51                    | 34:1                      | 599.50               | 319.26<br>345.27             | 16:0/18:1<br>18:1/16:0 | 90.4<br>9.6  | 489.39, 513.39              | CL (16:0/18:1(11A))_(16:0/18:1(11A))          |
| 1480.03         | 877.50                    | 34:2                      | 597.48               | 345.27<br>317.24             | 18:1/16:1<br>16:1/18:1 | 89.1<br>10.9 | 487.37, 511.37              | CL (18:1(11A)/18:1(11A))_(18:1(11A)/16:1(9A)) |
|                 | 905.53                    | 36:2                      | 625.52               | 345.27                       | 18:1/18:1              | -            | 515.41, 539.41              |                                               |
|                 |                           |                           |                      |                              |                        |              |                             |                                               |
| 1482.04         | 879.51                    | 34:1                      | 599.50               | 319.26<br>345.28             | 16:0/18:1<br>18:1/16:0 | 89.4<br>10.6 | 489.39, 513.39              | CL (18:1(11A)/18:1(11A))_(16:0/18:1(11A))     |
|                 | 905.53                    | 36:2                      | 625.52               | 345.27                       | 18:1/18:1              | -            | 515.41, 539.41              |                                               |
|                 |                           |                           |                      |                              |                        |              |                             |                                               |

**Table S4.** PTC CL structures characterized with *sn*-isomer resolution. Isomer percentages are not reported for PA moieties composed of identical acyl chains (i.e. 18:2/18:2) or moieties for which the *sn*-isomer was not identified.

| Precursor ( <i>m/z</i> ) | HCD                                |                           |                               | UVPD                                  |                            |             | CL Assignments                                                                                                                                                                                                                                                                                                                                                      |
|--------------------------|------------------------------------|---------------------------|-------------------------------|---------------------------------------|----------------------------|-------------|---------------------------------------------------------------------------------------------------------------------------------------------------------------------------------------------------------------------------------------------------------------------------------------------------------------------------------------------------------------------|
|                          | PA + Headgroup + Na ( <i>m/z</i> ) | PA Moiety Sum Composition | Dioxolane + Na ( <i>m/z</i> ) | Fatty Acid Allyl Ester ( <i>m/z</i> ) | <i>sn</i> -stereochemistry | PA Isomer % |                                                                                                                                                                                                                                                                                                                                                                     |
| 1500.00                  | 901.50                             | 36:4                      | 621.49                        | 343.26                                | 18:2/18:2                  | -           | CL(18:2/18:2)_(18:2/18:2),<br>CL(18:2/18:2)_(16:0/20:4),<br>CL(18:2/18:2)_(20:4/16:0),<br>CL(16:0/20:4)_(16:0/20:4),<br>CL(20:4/16:0)_(20:4/16:0),<br>CL(16:0/20:4)_(20:4/16:0)                                                                                                                                                                                     |
|                          |                                    |                           |                               | 319.26                                | 16:0/20:4                  | 89.5        |                                                                                                                                                                                                                                                                                                                                                                     |
|                          |                                    |                           |                               | 367.27                                | 20:4/16:0                  | 10.5        |                                                                                                                                                                                                                                                                                                                                                                     |
| 1502.01                  | 901.50                             | 36:4                      | 621.48                        | 343.26                                | 18:2/18:2                  | -           | CL(18:2/18:2)_(18:2/18:1),<br>CL(18:2/18:2)_(18:1/18:2),<br>CL(16:0/20:4)_(18:2/18:1),<br>CL(20:4/16:0)_(18:2/18:1),<br>CL(16:0/20:4)_(18:1/18:2),<br>CL(20:4/16:0)_(18:1/18:2)                                                                                                                                                                                     |
|                          |                                    |                           |                               | 319.26                                | 16:0/20:4                  | 89.7        |                                                                                                                                                                                                                                                                                                                                                                     |
|                          |                                    |                           |                               | 367.28                                | 20:4/16:0                  | 10.3        |                                                                                                                                                                                                                                                                                                                                                                     |
|                          | 903.51                             | 36:3                      | 623.50                        | 343.26                                | 18:2/18:1                  | 80.6        |                                                                                                                                                                                                                                                                                                                                                                     |
|                          |                                    |                           |                               | 345.28                                | 18:1/18:2                  | 19.4        |                                                                                                                                                                                                                                                                                                                                                                     |
| 1504.02                  | 903.51                             | 36:3                      | 623.50                        | 343.26                                | 18:2/18:1                  | 76.5        | CL(18:2/18:1)_(18:2/18:1),<br>CL(18:1/18:2)_(18:1/18:2),<br>CL(18:2/18:1)_(18:1/18:2)                                                                                                                                                                                                                                                                               |
|                          |                                    |                           |                               | 345.27                                | 18:1/18:2                  | 23.5        |                                                                                                                                                                                                                                                                                                                                                                     |
| 1526.01                  | 901.50                             | 36:4                      | 621.49                        | 343.26                                | 18:2/18:2                  | -           | CL(18:2/18:2)_(18:2/20:3),<br>CL(18:2/18:2)_(20:3/18:2),<br>CL(18:2/18:2)_(18:1/20:4),<br>CL(18:2/18:2)_(20:4/18:1),<br>CL(16:0/20:4)_(18:2/20:3),<br>CL(16:0/20:4)_(20:3/18:2),<br>CL(16:0/20:4)_(18:1/20:4),<br>CL(16:0/20:4)_(20:4/18:1),<br>CL(20:4/16:0)_(18:2/20:3),<br>CL(20:4/16:0)_(20:3/18:2),<br>CL(20:4/16:0)_(18:1/20:4),<br>CL(20:4/16:0)_(20:4/18:1) |
|                          |                                    |                           |                               | 319.26                                | 16:0/20:4                  | 89.6        |                                                                                                                                                                                                                                                                                                                                                                     |
|                          |                                    |                           |                               | 367.28                                | 20:4/16:0                  | 10.4        |                                                                                                                                                                                                                                                                                                                                                                     |
|                          | 927.51                             | 38:5                      | 647.50                        | 343.26                                | 18:2/20:3                  | 78.1        |                                                                                                                                                                                                                                                                                                                                                                     |
|                          |                                    |                           |                               | 369.27                                | 20:3/18:2                  | 21.9        |                                                                                                                                                                                                                                                                                                                                                                     |
|                          |                                    |                           |                               | 345.27                                | 18:1/20:4                  | 83.0        |                                                                                                                                                                                                                                                                                                                                                                     |
|                          |                                    |                           |                               | 367.26                                | 20:4/18:1                  | 17.0        |                                                                                                                                                                                                                                                                                                                                                                     |
| 1528.03                  | 901.50                             | 36:4                      | 621.48                        | 343.26                                | 18:2/18:2                  | -           | CL(18:2/18:2)_(18:0/20:4),<br>CL(18:2/18:2)_(18:2/20:2),<br>CL(18:2/18:2)_(20:2/18:2),<br>CL(16:0/20:4)_(18:0/20:4),<br>CL(16:0/20:4)_(18:2/20:2),<br>CL(16:0/20:4)_(20:2/18:2),<br>CL(20:4/16:0)_(18:0/20:4),<br>CL(20:4/16:0)_(18:2/20:2),<br>CL(20:4/16:0)_(20:2/18:2)                                                                                           |
|                          |                                    |                           |                               | 319.26                                | 16:0/20:4                  | 89.3        |                                                                                                                                                                                                                                                                                                                                                                     |
|                          |                                    |                           |                               | 367.28                                | 20:4/16:0                  | 10.7        |                                                                                                                                                                                                                                                                                                                                                                     |
|                          | 929.53                             | 38:4                      | 649.52                        | 347.29                                | 18:0/20:4                  | -           |                                                                                                                                                                                                                                                                                                                                                                     |
|                          |                                    |                           |                               | 343.26                                | 18:2/20:2                  | 81.8        |                                                                                                                                                                                                                                                                                                                                                                     |
|                          |                                    |                           |                               | 371.29                                | 20:2/18:2                  | 18.2        |                                                                                                                                                                                                                                                                                                                                                                     |
| 1530.04                  | 903.51                             | 36:3                      | 623.50                        | 343.26                                | 18:2/18:1                  | 63.7        | CL(18:2/18:1)_(18:0/20:4),<br>CL(18:2/18:1)_(18:2/20:2),<br>CL(18:2/18:1)_(20:2/18:2),<br>CL(18:1/18:2)_(18:0/20:4),<br>CL(18:1/18:2)_(18:2/20:2),<br>CL(18:1/18:2)_(20:2/18:2)                                                                                                                                                                                     |
|                          |                                    |                           |                               | 345.27                                | 18:1/18:2                  | 36.3        |                                                                                                                                                                                                                                                                                                                                                                     |
|                          | 929.53                             | 38:4                      | 649.52                        | 347.29                                | 18:0/20:4                  | -           |                                                                                                                                                                                                                                                                                                                                                                     |
|                          |                                    |                           |                               | 343.26                                | 18:2/20:2                  | 84.8        |                                                                                                                                                                                                                                                                                                                                                                     |
|                          |                                    |                           |                               | 371.29                                | 20:2/18:2                  | 15.2        |                                                                                                                                                                                                                                                                                                                                                                     |

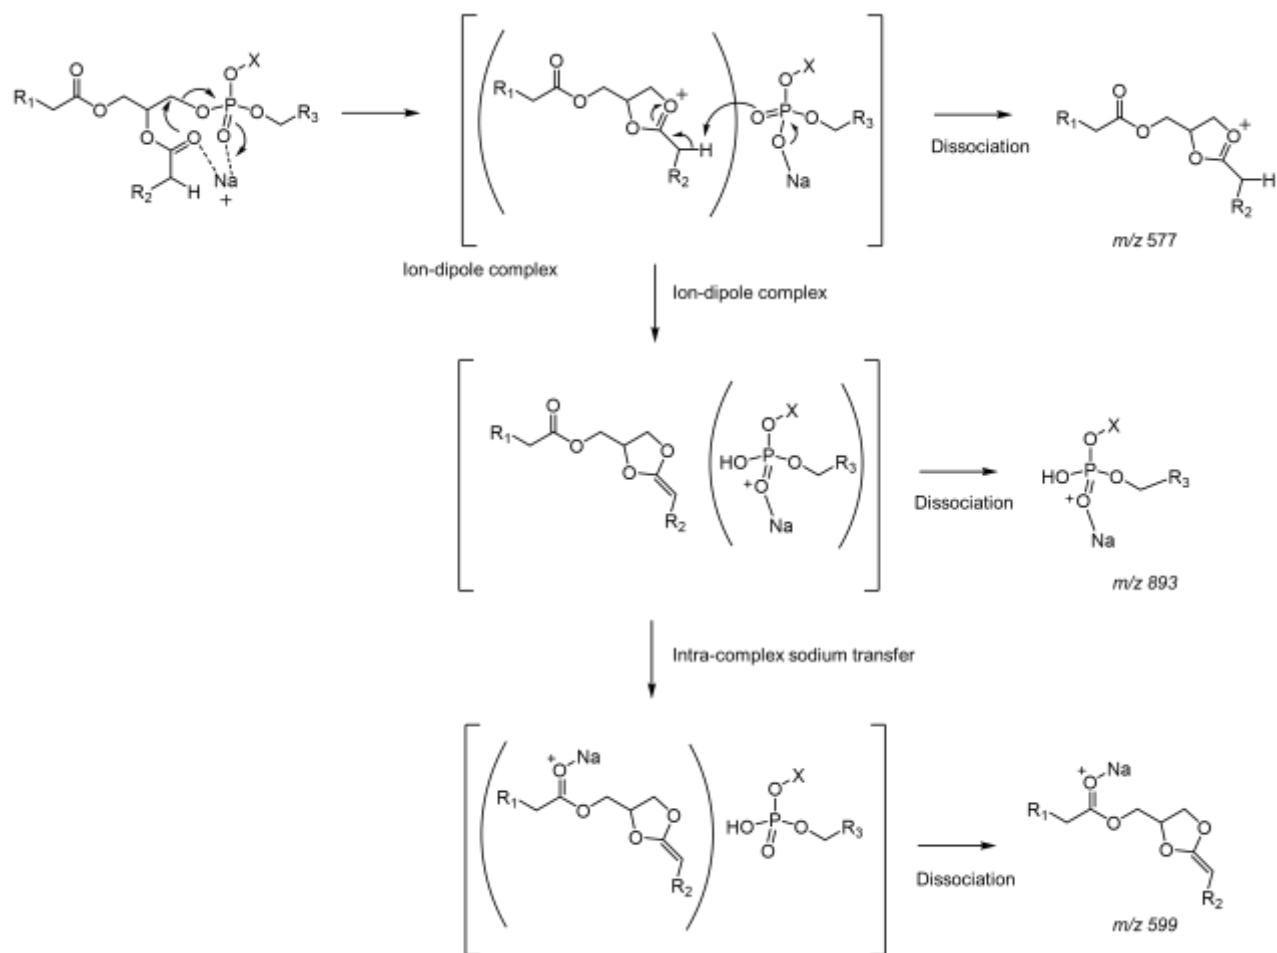

**Scheme S1.** Fragmentation pathway for dioxolane fragments from metal adducted glycerophospholipids. Fragment  $m/z$  mass labels correspond to HCD fragment masses in **Figure S1**. Adapted from Ref. 8 and 9.

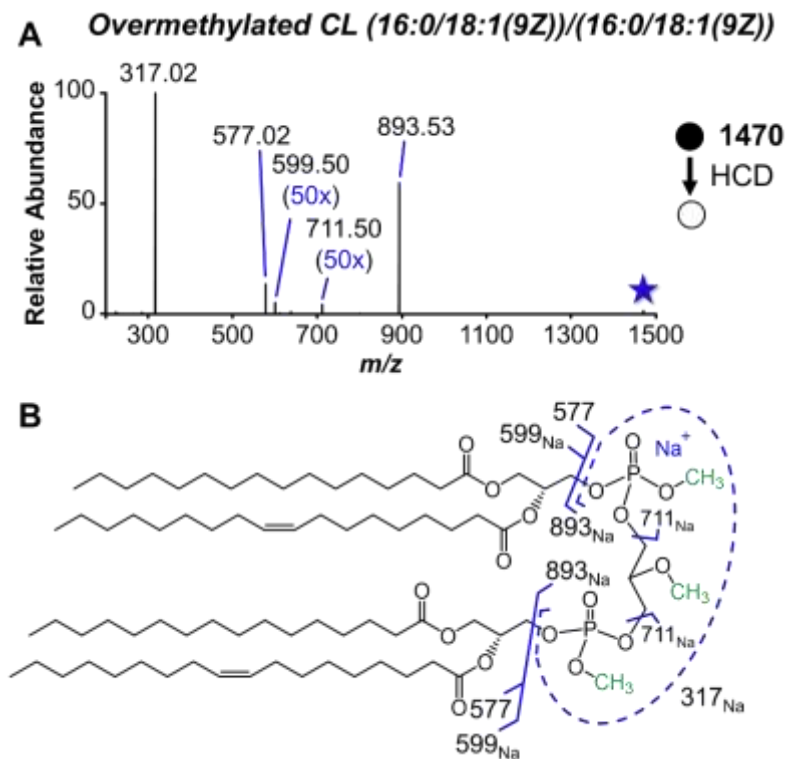

**Figure S1.** (A) HCD (25 NCE) spectrum of sodium-cationized overmethylated CL (16:0/18:1)/(16:0/18:1) and (B) fragment map. Fragment ions of  $m/z$  599.50 and  $m/z$  711.49 are shown with 50x magnification. Each selected precursor ion is demarcated with a star.

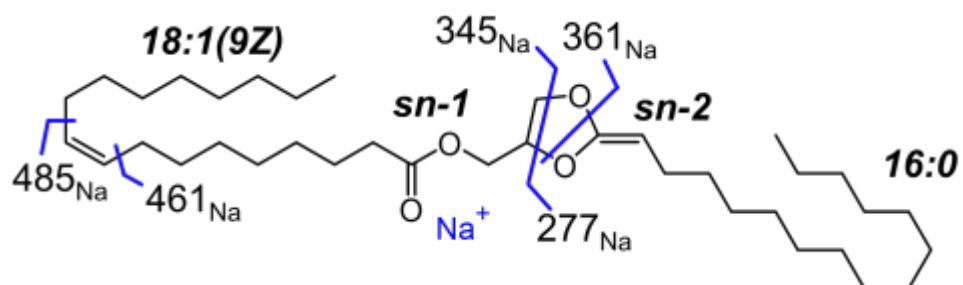

**Figure S2.** Fragment map for 18:1(9Z)/16:0 dioxolane *sn*-isomer marked with fragments observed in HCD/UVPD spectrum in **Figure 2C**.

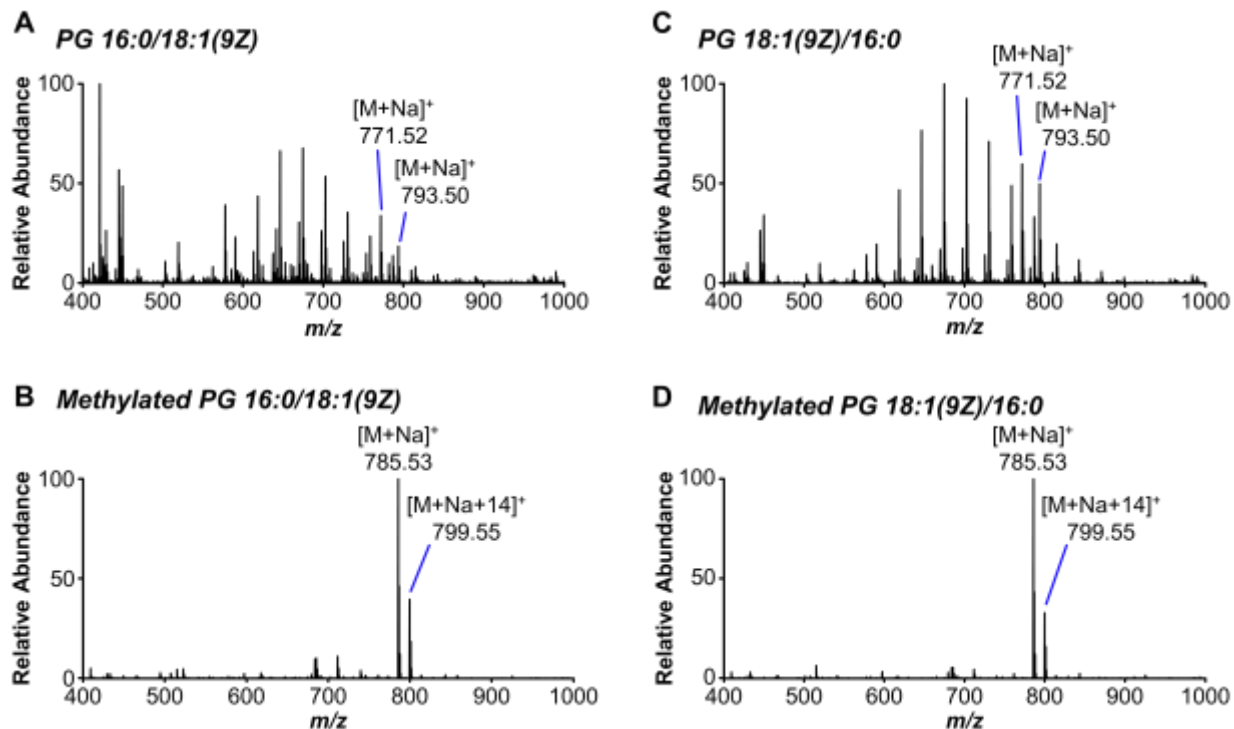

**Figure S3.** Positive mode nESI spectrum of PG 16:0/18:1(9Z) (A) prior to derivatization and (B) post TMSD methylation. Positive mode nESI spectrum of PG 18:1(9Z)/16:0 (C) prior to derivatization and (D) post TMSD methylation. CID spectra for methylated sodium-cationized ions are shown in **Figure S4**. CID/UVPD spectra are shown in **Figure 3**.

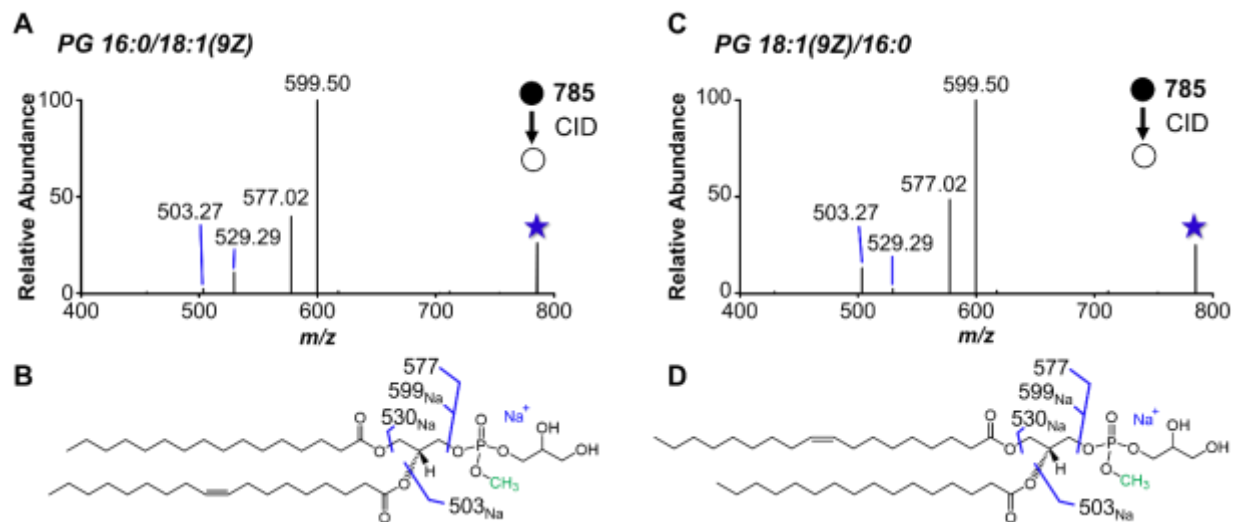

**Figure S4.** (A) CID (32 NCE) spectrum of sodium-cationized methylated PG 16:0/18:1(9Z) and (B) fragment map. (C) CID (32 NCE) spectrum of sodium-cationized methylated PG 18:1(9Z)/16:0 and (D) fragment map. CID/UVPD spectra are shown in **Figure 3**. Selected precursor ion is demarcated with a star.

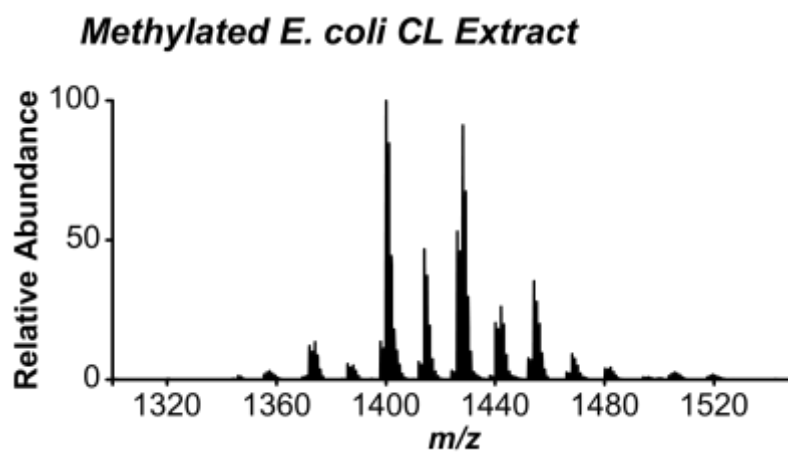

**Figure S5.** Positive mode MS<sup>1</sup> spectrum of methylated *E. coli* CL extract ionized from solution doped with sodium acetate.

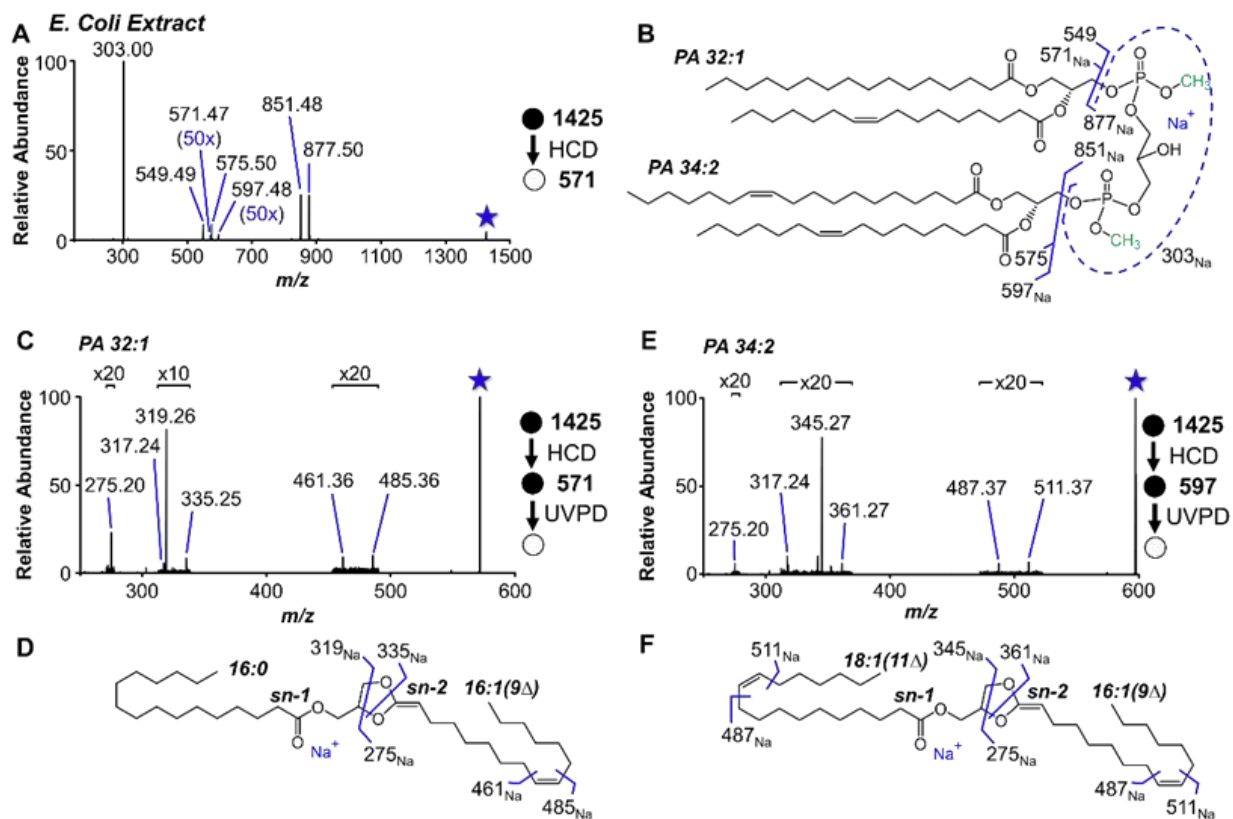

**Figure S6.** Structural characterization of CL at  $m/z$  1425 from *E. coli* extract after methylation. (A) HCD (35 NCE) fragments reveal PA moieties PA 32:1 and PA 34:2. Fragments of  $m/z$  571.47 and  $m/z$  597.26 are shown with 50x magnification. (B) HCD fragment map. (C) UVPD (10 pulses at 3 mJ) of headgroup loss fragment from PA 32:1,  $m/z$  571.47, confirms the major structure as PA 16:0/16:1(9Δ). (E) UVPD (10 pulses at 3 mJ) of headgroup loss fragment from PA 34:2,  $m/z$  597.48, confirms the major structure as PA 18:1(11Δ)/16:1(9Δ). Each selected precursor ion is demarcated with a star. Fragment maps constructed from (B) HCD and (D, F) HCD/UVPD elucidate the *E. coli* structure as CL (16:0/16:1(9Δ))<sub>2</sub> (18:1(11Δ)/16:1(9Δ)) at double bond and acyl chain position level.

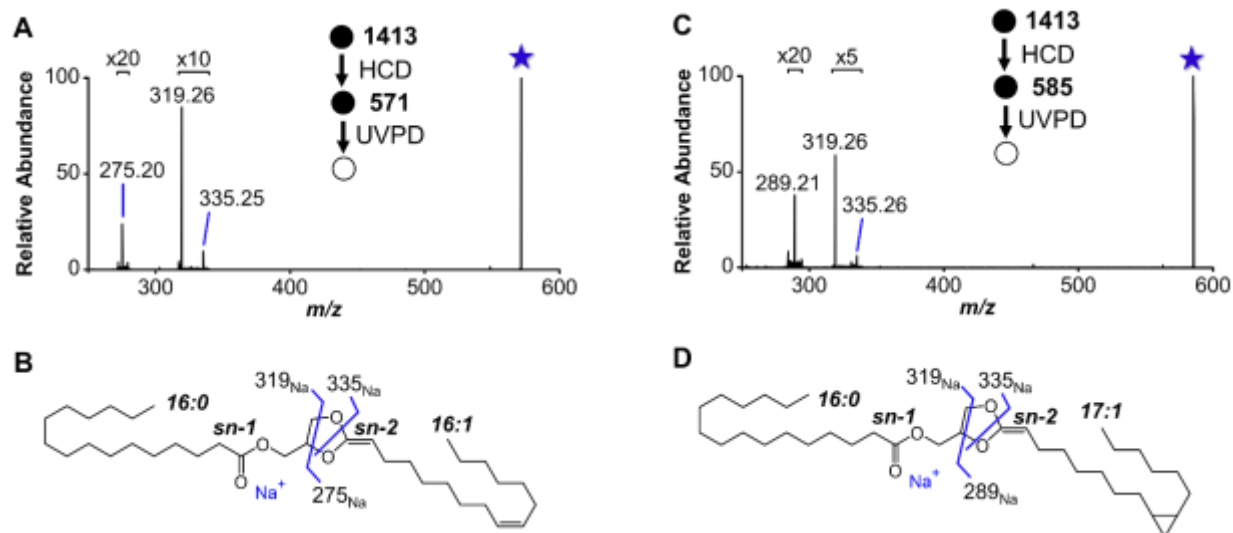

**Figure S7.** HCD/VPD analysis of PA moieties from CL 51:2 at  $m/z$  1413.98 produced from the methylated *E. coli* CL extract. (A) HCD/VPD of moiety PA 32:1 (dioxolane  $m/z$  of 571.47) results in fragment ions in agreement with (B) 16:0/16:1 dioxolane structure. (C) HCD/VPD of moiety PA 33:1 (dioxolane  $m/z$  of 585.48) results in fragment ions in agreement with (D) 16:0/17:1 dioxolane structure. Selected precursor ions are demarcated with a star. MS<sup>2</sup> HCD of  $m/z$  1413.98 is shown in **Figure S8A**.

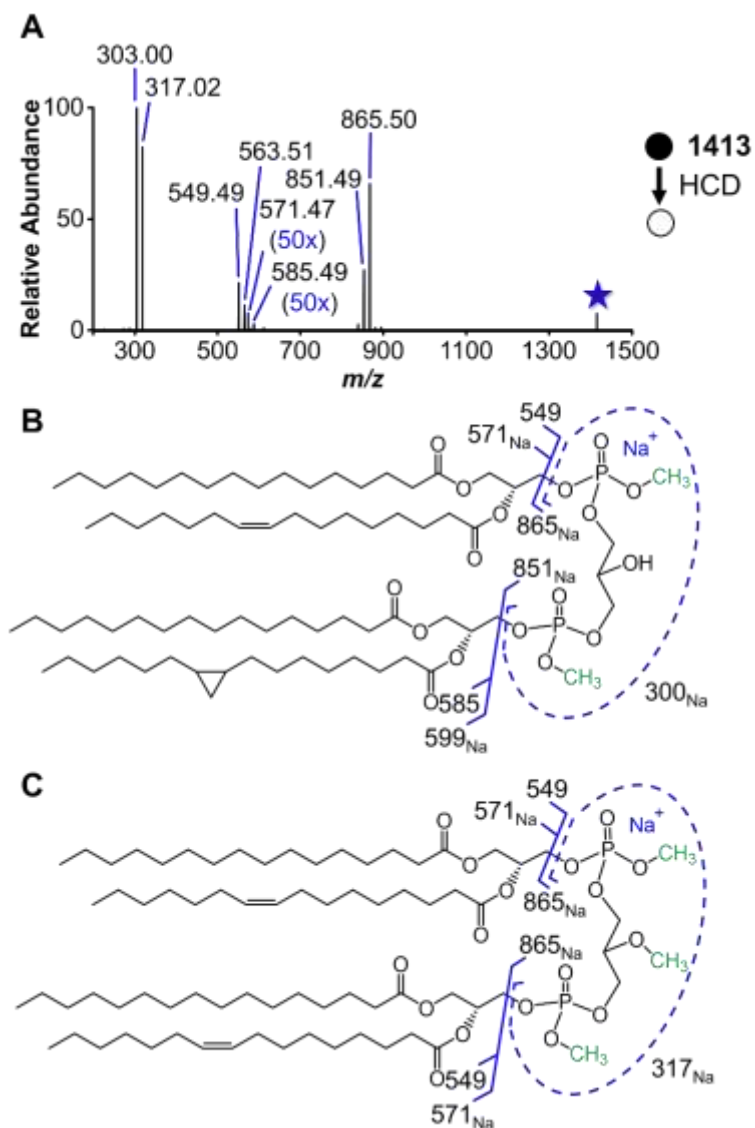

**Figure S8.** (A) HCD (25 NCE) spectrum of  $m/z$  1413.98 from methylated *E. coli* CL extract. Selected precursor is designated with a star. Fragment ions of  $m/z$  563.51 and  $m/z$  585.49 are shown with 50x magnification. Fragment maps for (B) methylated CL (16:0/16:1)<sub>16:0/17:1</sub> and (C) overmethylated CL (16:0/16:1)<sub>16:0/16:1</sub> are shown.

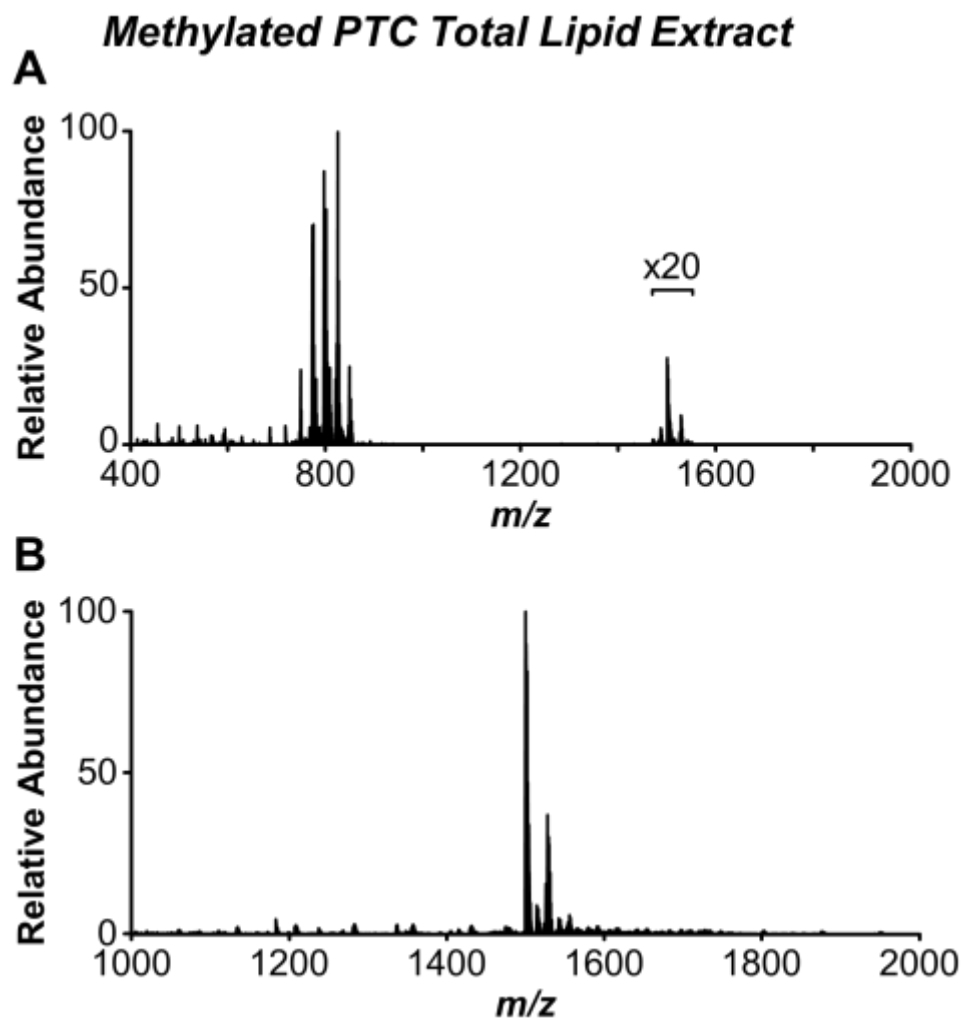

**Figure S9.** Positive mode MS<sup>1</sup> spectrum of methylated PTC total lipid extract ionized from solution doped with sodium acetate. (A) Scan from  $m/z$  400-2000, with 20x magnification of CLs present in 1400-1600  $m/z$  range. (B) Scan of  $m/z$  1000 – 2000, showing predominance of CL species in this mass range.

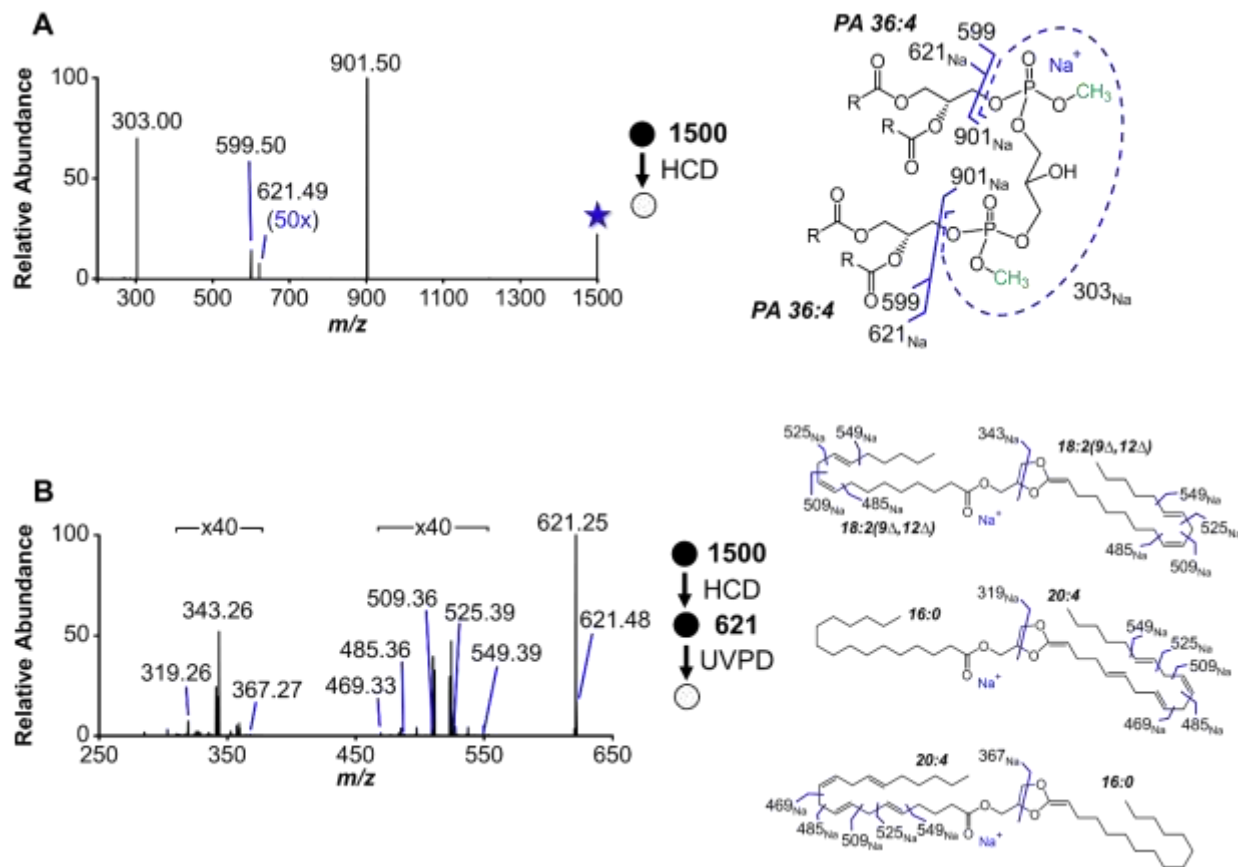

**Figure S10.** (A) HCD (25 NCE) spectrum and fragment map of  $m/z$  1500.00 from methylated PTC total lipid extract. Selected precursor is designated with a star. Fragment ion at  $m/z$  621.49 is shown with 50x magnification. (B) MS<sup>3</sup> UVPD (10 pulses at 3 mJ) of  $m/z$  621.49 and corresponding fragment maps for 18:2(9 $\Delta$ ,12 $\Delta$ )/18:2(9 $\Delta$ ,12 $\Delta$ ), 16:0/20:4, and 20:4/16:0 dioxolane structures. Ion at  $m/z$  621.25 was co-isolated with precursor of  $m/z$  621.49.

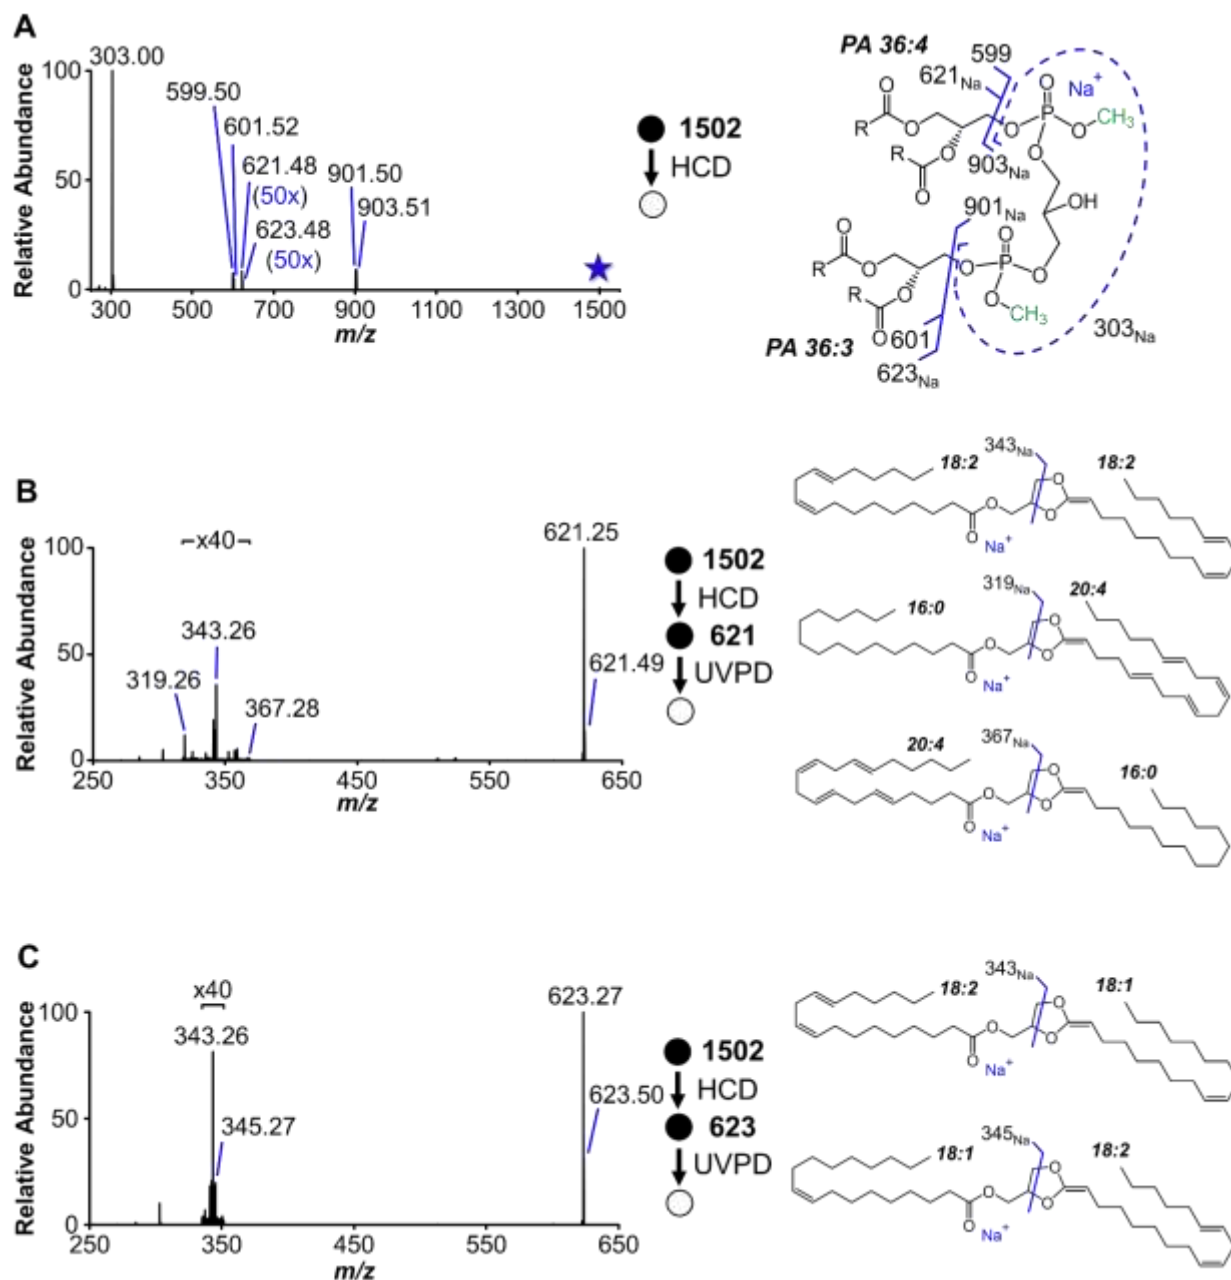

**Figure S11.** (A) HCD (25 NCE) spectrum and fragment map of  $m/z$  1502.01 from methylated PTC total lipid extract. Selected precursor is designated with a star. Fragment ions of  $m/z$  621.48 and  $m/z$  623.48 are shown with 50x magnification. (B) MS<sup>3</sup> UVPD (10 pulses at 3 mJ) of  $m/z$  621.48 and corresponding fragment maps for 18:2/18:2, 16:0/20:4, and 20:4/16:0 dioxolane structures. Ion at  $m/z$  621.25 was co-isolated with precursor of  $m/z$  621.49. (C) MS<sup>3</sup> UVPD (10 pulses at 3 mJ) of  $m/z$  623.48 and corresponding fragment maps for 18:1/18:2 and 18:2/18:1 dioxolane structures. Ion at  $m/z$  623.27 was co-isolated with precursor of  $m/z$  623.48.

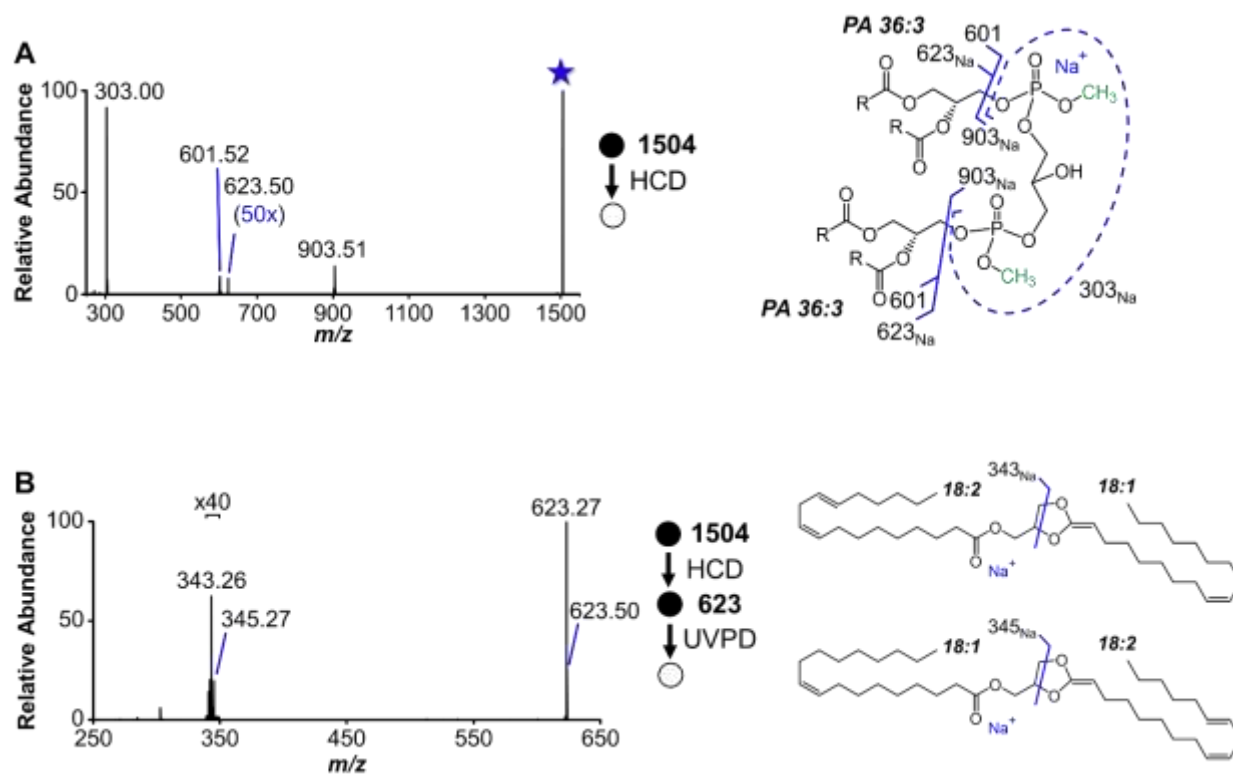

**Figure S12.** HCD (25 NCE) spectrum and fragment map of  $m/z$  1504.02 from methylated PTC total lipid extract. Selected precursor is designated with a star. Fragment ion at  $m/z$  623.50 is shown with 50x magnification. (B) MS<sup>3</sup> UVPD (10 pulses at 3 mJ) of  $m/z$  623.50 and corresponding fragment maps for 18:2/18:2 and 18:2/18:1 dioxolane structures. Ion at  $m/z$  623.27 was co-isolated with precursor of  $m/z$  623.50.

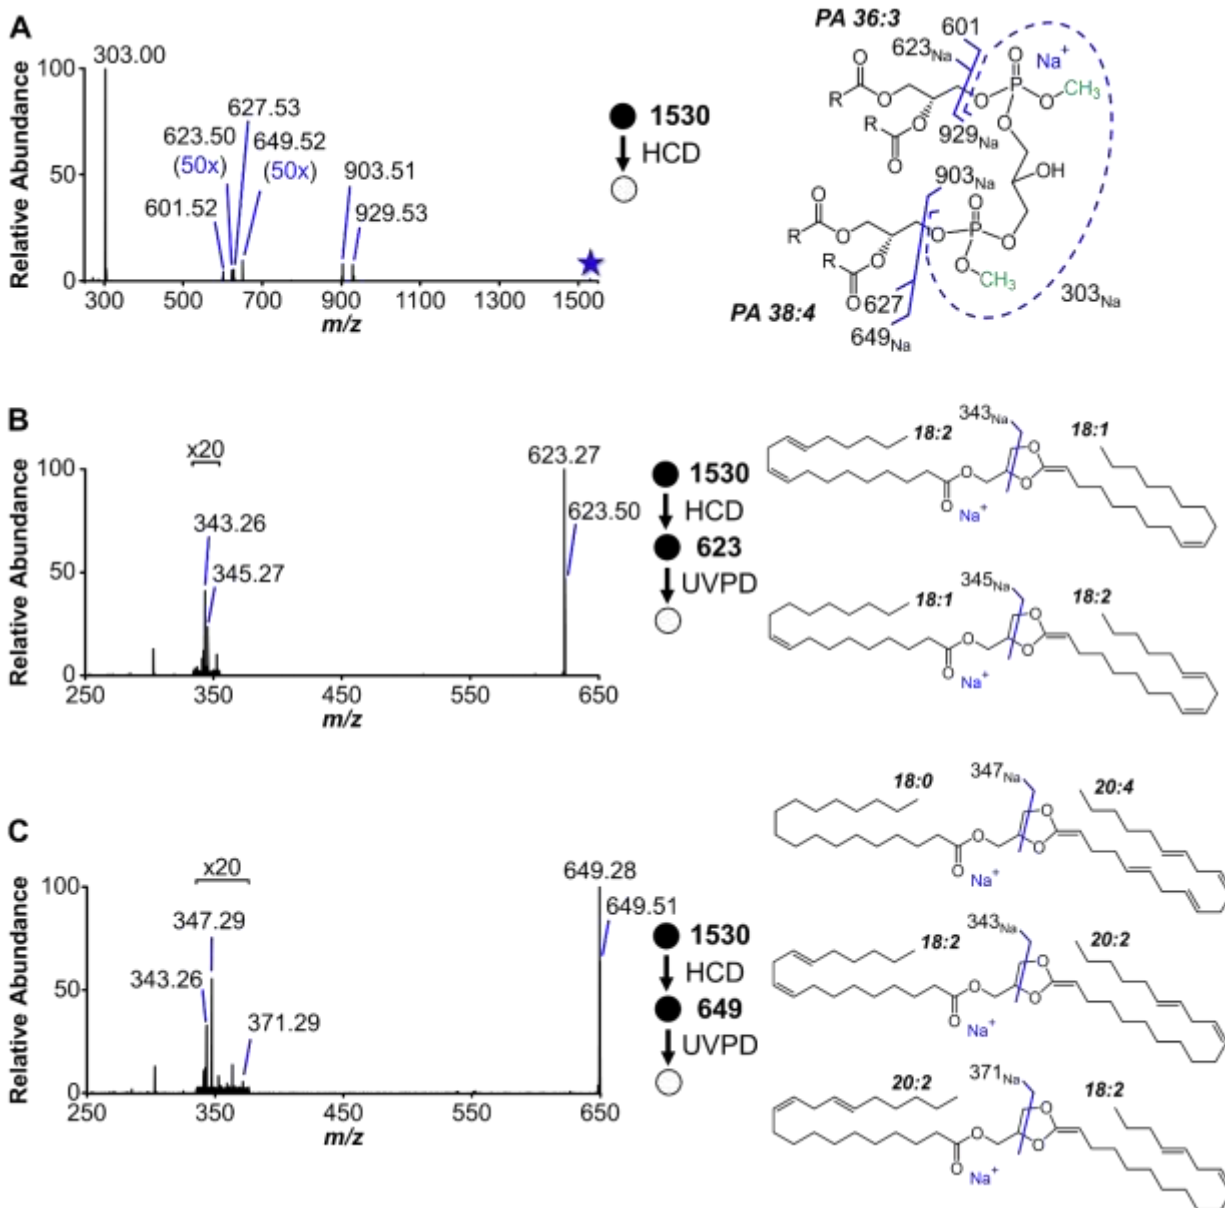

**Figure S13.** (A) HCD (25 NCE) spectrum and fragment map of  $m/z$  1530.04 from methylated PTC total lipid extract. Selected precursor is designated with a star. Fragment ions of  $m/z$  623.50 and  $m/z$  649.52 are shown with 50x magnification. (B) MS<sup>3</sup> UVPD (10 pulses at 3 mJ) of  $m/z$  623.50 and corresponding fragment maps for 18:2/18:1 and 18:1/18:2 dioxolane structures. Ion at  $m/z$  623.27 was co-isolated with precursor of  $m/z$  623.50. (C) MS<sup>3</sup> UVPD (10 pulses at 3 mJ) of  $m/z$  649.52 and corresponding fragment maps for 18:0/20:4, 18:2/20:2, and 20:2/18:2 dioxolane structures. Ion at  $m/z$  649.28 was co-isolated with precursor of  $m/z$  649.52.

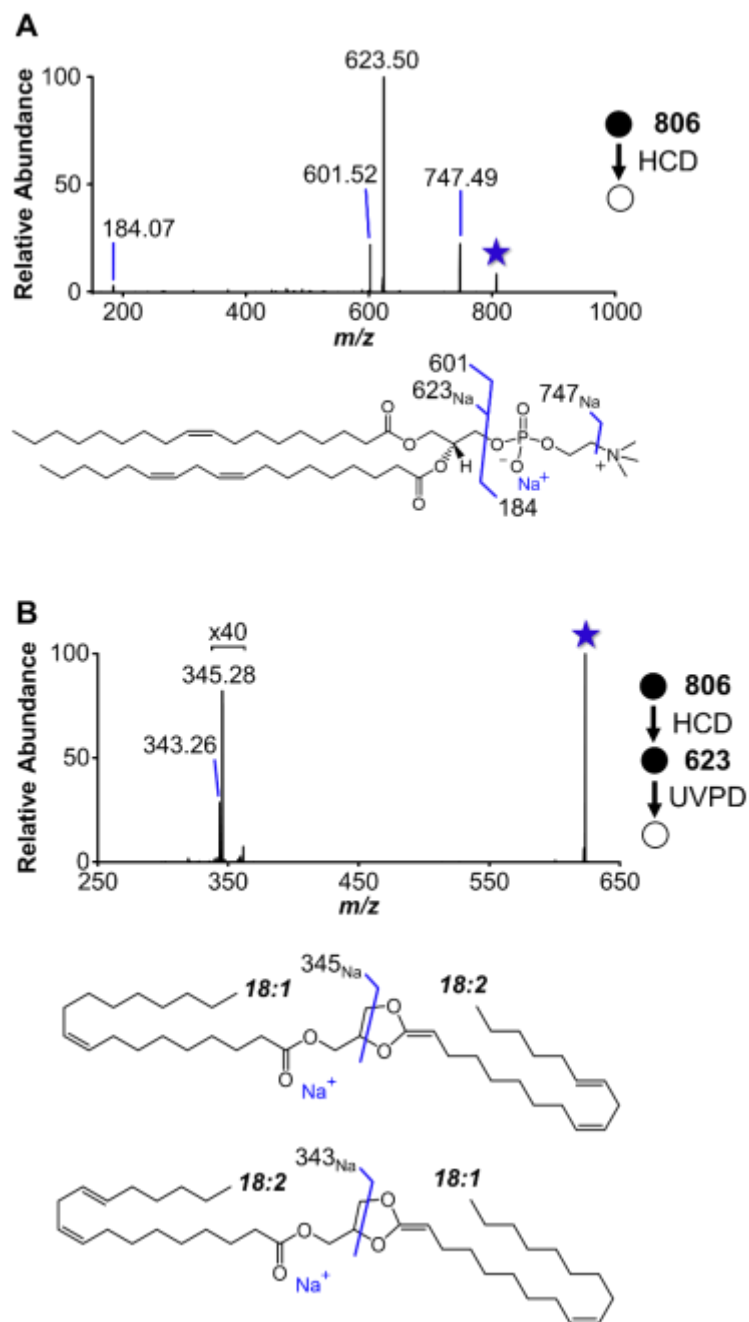

**Figure S14.** (A) HCD (30 NCE) spectrum and fragment map of  $m/z$  806.57 from underivatized PTC total lipid extract, corresponding to sodium adducted PC 36:3. (B) MS<sup>3</sup> UVPD (10 pulses at 3 mJ) of  $m/z$  623.50 and corresponding fragment maps for 18:2/18:1 and 18:1/18:2 dioxolane structures. Each selected precursor ion is demarcated with a star.

## Supplementary References

- (1) Bligh, E. G.; Dyer, W. J. A Rapid Method of Total Lipid Extraction and Purification. *Can. J. Biochem. Physiol.* **1959**, *37*, 911–917.
- (2) Xia, T.; Ren, H.; Zhang, W.; Xia, Y. Lipidome-Wide Characterization of Phosphatidylinositols and Phosphatidylglycerols on CC Location Level. *Analytica Chimica Acta* **2020**, *1128*, 107–115.
- (3) Lee, J. C.; Yang, J. S.; Moon, M. H. Simultaneous Relative Quantification of Various Polyglycerophospholipids with Isotope-Labeled Methylation by Nanoflow Ultrahigh Performance Liquid Chromatography-Tandem Mass Spectrometry. *Anal. Chem.* **2019**, *91*, 6716–6723.
- (4) Lee, J. C.; Byeon, S. K.; Moon, M. H. Relative Quantification of Phospholipids Based on Isotope-Labeled Methylation by Nanoflow Ultrahigh Performance Liquid Chromatography–Tandem Mass Spectrometry: Enhancement in Cardiolipin Profiling. *Anal. Chem.* **2017**, *89*, 4969–4977.
- (5) Cai, T.; Shu, Q.; Liu, P.; Niu, L.; Guo, X.; Ding, X.; Xue, P.; Xie, Z.; Wang, J.; Zhu, N.; Wu, P.; Niu, L.; Yang, F. Characterization and Relative Quantification of Phospholipids Based on Methylation and Stable Isotopic Labeling. *J Lipid Res* **2016**, *57*, 388–397.
- (6) Liebisch, G.; Vizcaíno, J. A.; Köfeler, H.; Trötz Müller, M.; Griffiths, W. J.; Schmitz, G.; Spener, F.; Wakelam, M. J. O. Shorthand Notation for Lipid Structures Derived from Mass Spectrometry. *J Lipid Res* **2013**, *54*, 1523–1530.
- (7) Macias, L. A.; Feider, C. L.; Eberlin, L. S.; Brodbelt, J. S. Hybrid 193 Nm Ultraviolet Photodissociation Mass Spectrometry Localizes Cardiolipin Unsaturation. *Anal. Chem.* **2019**, *91*, 12509–12516.
- (8) Hsu, F.-F.; Turk, J. Electrospray Ionization with Low-Energy Collisionally Activated Dissociation Tandem Mass Spectrometry of Glycerophospholipids: Mechanisms of Fragmentation and Structural Characterization. *J Chromatogr B Analyt Technol Biomed Life Sci* **2009**, *877* (26), 2673–2695.
- (9) Kirschbaum, C.; Greis, K.; Polewski, L.; Gewinner, S.; Schöllkopf, W.; Meijer, G.; von Helden, G.; Pagel, K. Unveiling Glycerolipid Fragmentation by Cryogenic Infrared Spectroscopy. *J. Am. Chem. Soc.* **2021**, *143* (36), 14827–14834.
